# Supplementary material for: High proliferation and delamination during skin epidermal stratification
Source: PubMed Central journal article supplement (PMC8163813; doi:10.1038/s41467-021-23386-4), 2021-05-28
Supplement: 41467_2021_23386_MOESM1_ESM.pdf [file 41467_2021_23386_MOESM1_ESM.pdf]

## **Supplementary Information**

### **High proliferation and delamination during skin epidermal stratification**

Damen et al., 2021

- **Supplementary Figures and Legends**
- **Supplementary Tables and Legends**

# Supplementary Figure 1

**a**

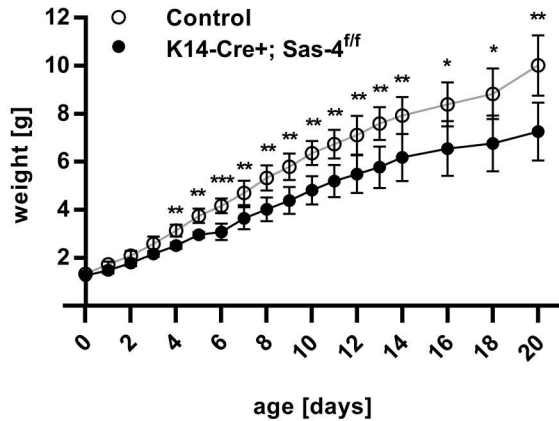

**b**

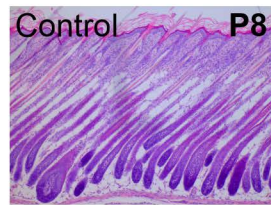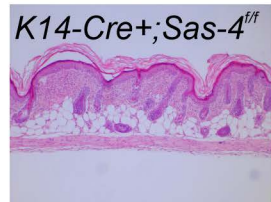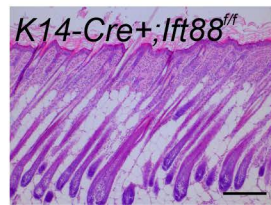

**c**

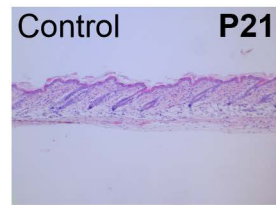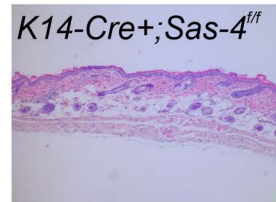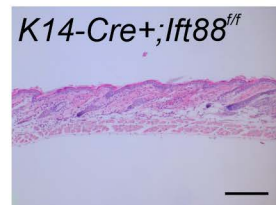

**Supplementary Figure 1. Body weight and hair follicle defects upon centriole loss in stratified epithelia including the skin epidermis.** (a) Measurements of the body weight of Control (n=7) and *K14-Cre+; Sas-4<sup>ff</sup>* (n=6) mice from P0 to P20. \* p < 0.05, \*\* p < 0.01, \*\*\* p < 0.001 (two-tailed student's T-test). Bars represent mean ± SD. (b,c) H&E histological staining of back-skin sections at P8 (b) and P21 (c) of Control, *K14-Cre+; Sas-4<sup>ff</sup>* and *K14-Cre+; Ift88<sup>ff</sup>* mice (scale bars: 100 μm).

# Supplementary Figure 2

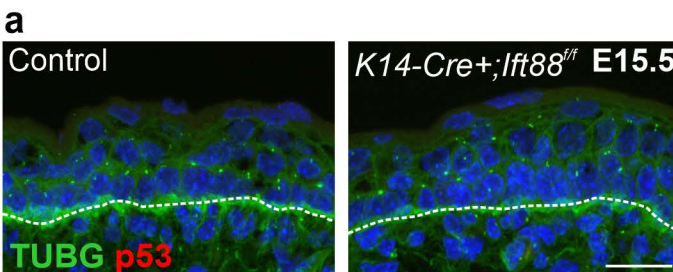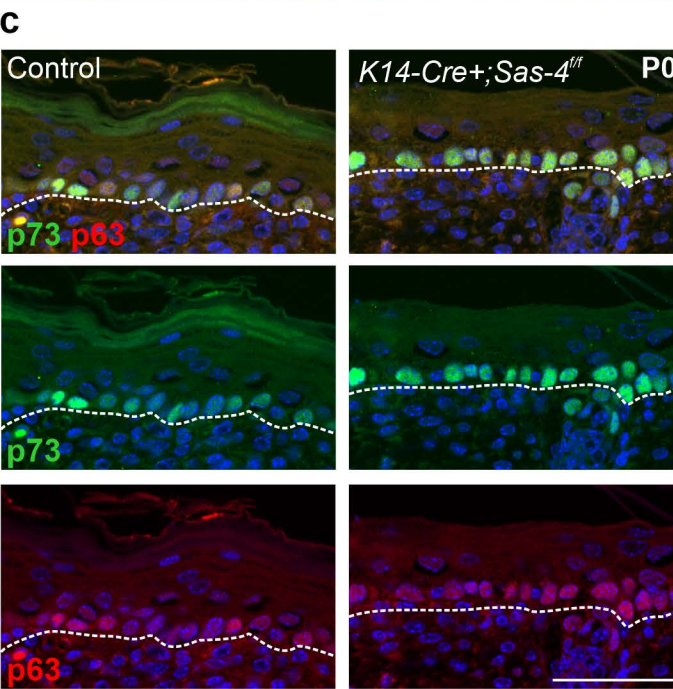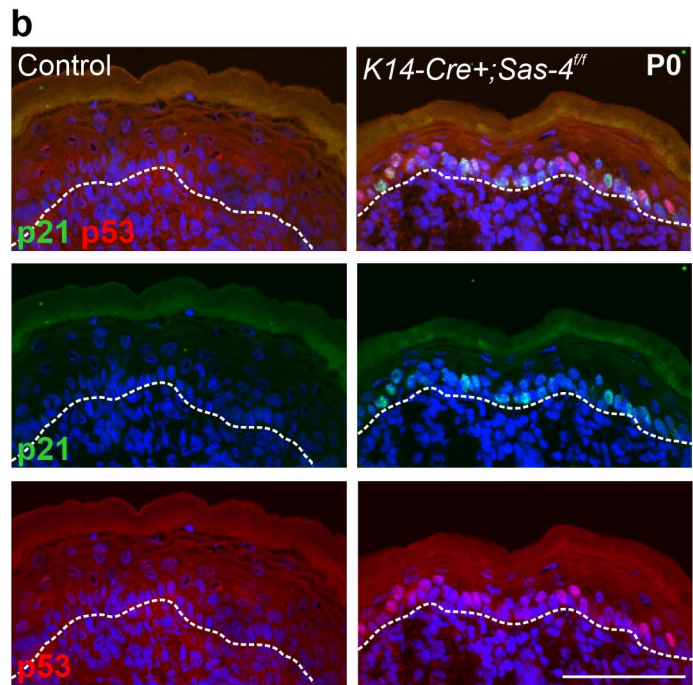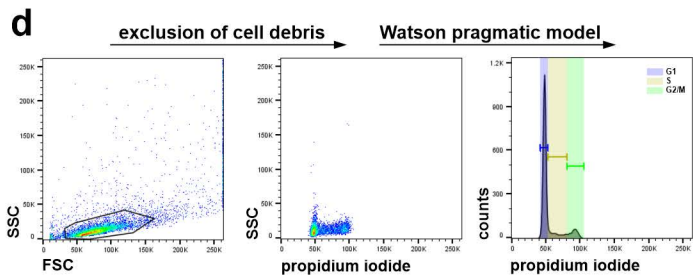

**Supplementary Figure 2. p53 pathway in cilia and centrosome mutant epidermis. (a)**

Immunostaining of Control and *K14-Cre+; Ift88<sup>fl/fl</sup>* back-skin sections at E15.5 showing no detectable p53 upregulation (red) in cilia mutants (scale bar: 20  $\mu\text{m}$ ). TUBG (green) marks the centrosomes. Dashed line represents the epidermal-dermal interface in all panels. **(b,c)**

Immunostaining of p21 (green) and p53 (red) **(b)** or p63 (red) and p73 (green) **(c)** of Control and *K14-Cre+; Sas-4<sup>fl/fl</sup>* back-skin sections at P0 (scale bars: 80  $\mu\text{m}$  **(b)**, 50  $\mu\text{m}$  **(c)**). **(d)**

Representative example of the gating strategy used for cell cycle analysis based on propidium iodide-stained keratinocytes from Controls shown in Fig. 2f. Cell debris were excluded by gating. The Watson pragmatic model was used to calculate the proportions of cells in G1, S and G2/M phase.

## Supplementary Tables

### Supplementary Table 1

| Upregulated Genes  |            |               | Downregulated Genes |            |           |
|--------------------|------------|---------------|---------------------|------------|-----------|
| Ensembl ID         | FoldChange | Gene          | Ensembl ID          | FoldChange | Gene      |
| ENSMUSG00000034818 | 14.2       | Celf5         | ENSMUSG00000032011  | -3.8       | Thy1      |
| ENSMUSG0000001986  | 13.1       | Gria3         | ENSMUSG00000010122  | -3.1       | Slc47a1   |
| ENSMUSG00000046818 | 12.1       | Ddit4l        | ENSMUSG00000025348  | -3.0       | Itga7     |
| ENSMUSG00000007783 | 12.1       | Cpt1c         | ENSMUSG00000020334  | -2.7       | Slc22a4   |
| ENSMUSG00000024731 | 11.6       | Ms4a10        | ENSMUSG00000017737  | -2.7       | Mmp9      |
| ENSMUSG00000026288 | 11.3       | Inpp5d        | ENSMUSG00000059049  | -2.7       | Frem1     |
| ENSMUSG00000040350 | 11.1       | Trim7         | ENSMUSG000000091722 | -2.6       | Siah3     |
| ENSMUSG00000075334 | 10.5       | Rprm          | ENSMUSG00000022754  | -2.5       | Tmem45a   |
| ENSMUSG00000026399 | 9.5        | Cd55          | ENSMUSG00000048142  | -2.5       | Nat8l     |
| ENSMUSG00000034457 | 9.2        | Eda2r         | ENSMUSG00000043441  | -2.5       | Gpr149    |
| ENSMUSG00000097993 | 8.4        |               | ENSMUSG00000030047  | -2.5       | Arhgap25  |
| ENSMUSG00000073805 | 8.2        | Fam196a       | ENSMUSG00000096351  | -2.4       | Samd11    |
| ENSMUSG00000040265 | 8.1        | Dnm3          | ENSMUSG00000033774  | -2.4       | Npbwr1    |
| ENSMUSG00000031886 | 7.9        | Ces2e         | ENSMUSG00000073601  | -2.3       | Serpinb3c |
| ENSMUSG00000028610 | 7.6        | Dmrtb1        | ENSMUSG00000005125  | -2.3       | Ndrp1     |
| ENSMUSG00000038295 | 7.4        | Atg9b         | ENSMUSG00000064128  | -2.3       | Cenpj     |
| ENSMUSG00000028211 | 7.3        | Trp53inp1     | ENSMUSG00000050108  | -2.3       | Bpifc     |
| ENSMUSG00000010651 | 7.3        | Acaa1b        | ENSMUSG00000068874  | -2.2       | Selenbp1  |
| ENSMUSG00000074968 | 7.2        | Ano3          | ENSMUSG00000000305  | -2.2       | Cdh4      |
| ENSMUSG00000037887 | 7.2        | Dusp8         | ENSMUSG00000034107  | -2.2       | Ano7      |
| ENSMUSG00000048458 | 7.1        | Fam212b       | ENSMUSG00000041986  | -2.2       | Elmod1    |
| ENSMUSG00000028600 | 6.7        | Podn          | ENSMUSG00000004328  | -2.1       | Hif3a     |
| ENSMUSG00000044816 | 6.7        | D630023F18Rik | ENSMUSG00000063626  | -2.1       | Unc5d     |
| ENSMUSG00000037855 | 6.7        | Zfp365        | ENSMUSG00000017167  | -2.1       | Cntnap1   |
| ENSMUSG00000028970 | 6.6        | Abcb1b        | ENSMUSG00000024743  | -2.1       | Syt7      |
| ENSMUSG00000040432 | 6.5        | Ltb4r2        | ENSMUSG00000020695  | -2.1       | Mrc2      |
| ENSMUSG00000021185 | 6.3        | 9030617O03Rik | ENSMUSG00000097050  | -2.1       |           |
| ENSMUSG00000046908 | 6.3        | Ltb4r1        | ENSMUSG00000036908  | -2.1       | Unc93b1   |
| ENSMUSG00000024778 | 6.2        | Fas           | ENSMUSG00000015970  | -2.1       | Chdh      |
| ENSMUSG00000079022 | 6.0        | Col22a1       | ENSMUSG00000021779  | -2.1       | Thrb      |
| ENSMUSG00000020467 | 5.6        | Efemp1        | ENSMUSG00000037579  | -2.1       | Kcnh3     |
| ENSMUSG00000020326 | 5.6        | Ccng1         | ENSMUSG00000027750  | -2.1       | Postn     |
| ENSMUSG0000002083  | 5.4        | Bbc3          | ENSMUSG00000036422  | -2.1       | Pcdh8     |
| ENSMUSG00000042078 | 5.2        | Svop          | ENSMUSG00000107632  | -2.1       |           |
| ENSMUSG00000023067 | 5.1        | Cdkn1a        | ENSMUSG00000028236  | -2.1       | Sdr16c5   |
| ENSMUSG00000086245 | 5.1        |               | ENSMUSG00000035112  | -2.0       | Wnk4      |
| ENSMUSG00000019194 | 5.0        | Scn1b         | ENSMUSG00000032204  | -2.0       | Aqp9      |
| ENSMUSG00000032135 | 5.0        | Mcam          | ENSMUSG00000046834  | -2.0       | Krt1      |
| ENSMUSG00000036960 | 4.9        | Clca2         | ENSMUSG00000061928  | -2.0       | Dsg1b     |
| ENSMUSG00000005107 | 4.8        | Slc2a9        | ENSMUSG00000026185  | -2.0       | Igfbp5    |

| EnsemblID           | FoldChange | Gene          | EnsemblID          | FoldChange | Gene          |
|---------------------|------------|---------------|--------------------|------------|---------------|
| ENSMUSG00000058669  | 4.8        | Nkx2-9        | ENSMUSG00000096001 | -2.0       | 2610528A11Rik |
| ENSMUSG00000044365  | 4.8        | Cxxc4         | ENSMUSG00000061517 | -2.0       | Sox21         |
| ENSMUSG000000085389 | 4.8        |               | ENSMUSG00000020027 | -2.0       | Socs2         |
| ENSMUSG00000002020  | 4.8        | Ltbp2         | ENSMUSG00000111229 | -2.0       |               |
| ENSMUSG00000042268  | 4.7        | Slc26a9       |                    |            |               |
| ENSMUSG00000059895  | 4.6        | Ptp4a3        |                    |            |               |
| ENSMUSG00000043557  | 4.4        | Mdga1         |                    |            |               |
| ENSMUSG00000068335  | 4.4        | Dok1          |                    |            |               |
| ENSMUSG00000038776  | 4.3        | Ephx1         |                    |            |               |
| ENSMUSG00000058740  | 4.2        | Kcnt1         |                    |            |               |
| ENSMUSG00000098470  | 4.1        | C1rb          |                    |            |               |
| ENSMUSG00000032839  | 4.1        | Trpc1         |                    |            |               |
| ENSMUSG00000026831  | 4.0        | 1700007K13Rik |                    |            |               |
| ENSMUSG00000033578  | 4.0        | Tmem35a       |                    |            |               |
| ENSMUSG00000036596  | 4.0        | Cpz           |                    |            |               |
| ENSMUSG00000039450  | 3.9        | Dcxr          |                    |            |               |
| ENSMUSG00000073418  | 3.9        | C4b           |                    |            |               |
| ENSMUSG00000009216  | 3.9        | Fam163b       |                    |            |               |
| ENSMUSG00000040918  | 3.8        | Slc19a2       |                    |            |               |
| ENSMUSG00000059013  | 3.7        | Sh2d3c        |                    |            |               |
| ENSMUSG00000031877  | 3.7        | Ces2g         |                    |            |               |
| ENSMUSG00000045658  | 3.7        | Pid1          |                    |            |               |
| ENSMUSG00000036480  | 3.7        | Prss56        |                    |            |               |
| ENSMUSG00000023000  | 3.6        | Dhh           |                    |            |               |
| ENSMUSG00000105039  | 3.6        |               |                    |            |               |
| ENSMUSG00000032064  | 3.6        | Dixdc1        |                    |            |               |
| ENSMUSG00000032057  | 3.6        | 4833427G06Rik |                    |            |               |
| ENSMUSG00000046449  | 3.5        | C77370        |                    |            |               |
| ENSMUSG00000041670  | 3.5        |               |                    |            |               |
| ENSMUSG00000051879  | 3.5        | Krt71         |                    |            |               |
| ENSMUSG00000008167  | 3.5        | Fbxw9         |                    |            |               |
| ENSMUSG00000026249  | 3.5        | Serpine2      |                    |            |               |
| ENSMUSG00000007908  | 3.5        | Hmgcl1        |                    |            |               |
| ENSMUSG00000034394  | 3.5        | Lif           |                    |            |               |
| ENSMUSG00000027663  | 3.4        | Zmat3         |                    |            |               |
| ENSMUSG000000086825 | 3.4        |               |                    |            |               |
| ENSMUSG00000015451  | 3.4        |               |                    |            |               |
| ENSMUSG00000109608  | 3.4        |               |                    |            |               |
| ENSMUSG00000038963  | 3.4        | Slco4a1       |                    |            |               |
| ENSMUSG00000020423  | 3.4        | Btg2          |                    |            |               |
| ENSMUSG00000051811  | 3.4        | Cox6b2        |                    |            |               |
| ENSMUSG00000002257  | 3.3        | Def6          |                    |            |               |
| ENSMUSG00000095993  | 3.3        |               |                    |            |               |
| ENSMUSG00000031026  | 3.3        | Trim66        |                    |            |               |
| ENSMUSG00000023032  | 3.3        | Slc4a8        |                    |            |               |

| EnsemblID           | FoldChange | Gene    | EnsemblID | FoldChange | Gene |
|---------------------|------------|---------|-----------|------------|------|
| ENSMUSG00000028195  | 3.3        | Cyr61   |           |            |      |
| ENSMUSG00000041889  | 3.2        | Shisa4  |           |            |      |
| ENSMUSG00000039813  | 3.1        | Tbc1d2  |           |            |      |
| ENSMUSG00000033740  | 3.1        | St18    |           |            |      |
| ENSMUSG00000027931  | 3.1        | Npr1    |           |            |      |
| ENSMUSG00000020963  | 3.1        | Tshr    |           |            |      |
| ENSMUSG00000031374  | 3.1        | Zfp92   |           |            |      |
| ENSMUSG00000011263  | 3.0        | Exoc3l2 |           |            |      |
| ENSMUSG00000028480  | 3.0        | Glipr2  |           |            |      |
| ENSMUSG000000086040 | 3.0        | Wipf3   |           |            |      |
| ENSMUSG00000021668  | 3.0        | Polk    |           |            |      |
| ENSMUSG00000032128  | 3.0        | Robo3   |           |            |      |
| ENSMUSG00000028893  | 2.9        | Sesn2   |           |            |      |
| ENSMUSG00000024521  | 2.9        | Pmaip1  |           |            |      |
| ENSMUSG00000001025  | 2.9        | S100a6  |           |            |      |

**Supplementary Table 1. Differentially expressed genes in the centrosome mutant epidermis at E13.5.** List of Top 100 up- and down-regulated differentially expressed genes with  $\geq 2$ -fold changes and p-values  $< 0.05$  (two-tailed student's T-test) based on RNA-Seq analysis of Control and *K14-Cre+*; *Sas-4<sup>ff</sup>* epidermis at E13.5. The positive values are upregulated in the mutants.



## Supplementary Table 2

| Upregulated Genes  |            |           | Downregulated Genes |            |          |
|--------------------|------------|-----------|---------------------|------------|----------|
| EnsemblID          | FoldChange | Gene      | EnsemblID           | FoldChange | Gene     |
| ENSMUSG00000056054 | 53.0       | S100a8    | ENSMUSG00000096257  | -150.1     | Ccer2    |
| ENSMUSG00000058354 | 52.8       | Krt6a     | ENSMUSG00000009216  | -92.6      | Fam163b  |
| ENSMUSG00000063975 | 39.7       | Slco1a5   | ENSMUSG00000009097  | -61.7      | Tbx1     |
| ENSMUSG00000042157 | 32.9       | Sprr2i    | ENSMUSG00000064325  | -61.0      | Hhip     |
| ENSMUSG00000058669 | 28.4       | Nkx2-9    | ENSMUSG00000004892  | -54.3      | Bcan     |
| ENSMUSG00000102308 | 27.8       |           | ENSMUSG00000038754  | -51.2      | Elov13   |
| ENSMUSG00000023041 | 27.2       | Krt6b     | ENSMUSG00000057604  | -36.6      | Lmcd1    |
| ENSMUSG00000085183 | 24.8       |           | ENSMUSG00000027869  | -34.6      | Hsd3b6   |
| ENSMUSG00000064232 | 22.3       | Gm5414    | ENSMUSG00000040612  | -34.1      | Ildr2    |
| ENSMUSG00000056071 | 22.2       | S100a9    | ENSMUSG00000048013  | -33.6      | Krt35    |
| ENSMUSG00000026387 | 20.8       | Sctr      | ENSMUSG00000048450  | -32.7      | Msx1     |
| ENSMUSG00000050063 | 20.2       | Klk6      | ENSMUSG00000020140  | -31.1      | Lgr5     |
| ENSMUSG00000046354 | 19.3       | Defb14    | ENSMUSG00000049685  | -30.4      | Cyp2g1   |
| ENSMUSG00000023000 | 19.3       | Dhh       | ENSMUSG00000046470  | -28.0      | Sox18    |
| ENSMUSG00000087659 | 19.0       |           | ENSMUSG00000033491  | -27.8      | Prss35   |
| ENSMUSG00000046402 | 18.4       | Rbp1      | ENSMUSG00000070990  | -27.0      | Foxe1    |
| ENSMUSG00000055030 | 18.4       | Sprr2e    | ENSMUSG00000066113  | -25.5      | Adamts1  |
| ENSMUSG00000024810 | 17.9       | Il33      | ENSMUSG00000035775  | -25.1      | Krt20    |
| ENSMUSG00000042212 | 17.3       | Sprr2d    | ENSMUSG00000053626  | -24.8      | Tll1     |
| ENSMUSG00000104554 | 17.2       |           | ENSMUSG00000031891  | -24.8      | Hsd11b2  |
| ENSMUSG00000017817 | 16.8       | Jph2      | ENSMUSG00000035258  | -23.0      | Abi3bp   |
| ENSMUSG00000109145 | 16.1       |           | ENSMUSG00000055937  | -22.4      | Krt28    |
| ENSMUSG00000017002 | 15.4       | Slpi      | ENSMUSG00000055421  | -22.2      | Pcdh9    |
| ENSMUSG00000046259 | 14.3       | Sprr2h    | ENSMUSG00000018868  | -22.0      | Pnpla5   |
| ENSMUSG00000062991 | 14.1       | Nrg1      | ENSMUSG00000047730  | -21.5      | Fcgbp    |
| ENSMUSG00000025020 | 14.0       | Slit1     | ENSMUSG00000026185  | -21.5      | Igfbp5   |
| ENSMUSG00000030268 | 14.0       | Bcat1     | ENSMUSG00000031375  | -21.3      | Bgn      |
| ENSMUSG00000109392 | 13.6       |           | ENSMUSG00000069805  | -21.3      | Fbp1     |
| ENSMUSG00000027925 | 13.5       |           | ENSMUSG00000041272  | -21.2      | Tox      |
| ENSMUSG00000110542 | 13.1       |           | ENSMUSG00000073043  | -20.9      | Atoh1    |
| ENSMUSG00000029377 | 12.6       | Ereg      | ENSMUSG00000031757  | -20.4      | Mt4      |
| ENSMUSG00000053797 | 12.6       | Krt16     | ENSMUSG00000040950  | -19.4      | Mgl2     |
| ENSMUSG00000021214 | 12.2       | Akr1c18   | ENSMUSG00000000440  | -19.3      | Pparg    |
| ENSMUSG00000101199 | 12.2       |           | ENSMUSG00000050511  | -19.3      | Oprd1    |
| ENSMUSG00000104155 | 12.0       |           | ENSMUSG00000021994  | -18.9      | Wnt5a    |
| ENSMUSG00000048455 | 11.9       | Sprr1b    | ENSMUSG00000015665  | -18.7      | Awat1    |
| ENSMUSG00000042244 | 11.5       | Pglyrp3   | ENSMUSG00000053441  | -18.6      | Adamts19 |
| ENSMUSG00000068859 | 11.5       | Sp9       | ENSMUSG00000068407  | -18.6      | Rnase12  |
| ENSMUSG00000026420 | 11.4       | Il24      | ENSMUSG00000001804  | -18.5      | Dsg4     |
| ENSMUSG00000079451 | 11.4       | Tmprss11g | ENSMUSG00000029544  | -18.4      | Cabp1    |
| ENSMUSG00000026700 | 11.3       | Tnfsf4    | ENSMUSG00000056222  | -18.2      | Spock1   |
| ENSMUSG00000027520 | 11.2       | Zdbf2     | ENSMUSG00000052974  | -18.2      | Cyp2f2   |

| EnsemblID          | FoldChange | Gene          | EnsemblID          | FoldChange | Gene     |
|--------------------|------------|---------------|--------------------|------------|----------|
| ENSMUSG00000079018 | 11.1       | Ly6c1         | ENSMUSG00000033579 | -18.1      | Fa2h     |
| ENSMUSG00000054958 | 11.1       | Nt5c1a        | ENSMUSG00000041730 | -18.0      | Prrxl1   |
| ENSMUSG00000092500 | 11.0       |               | ENSMUSG00000044288 | -17.7      | Cnr1     |
| ENSMUSG00000030098 | 10.9       | Grip2         | ENSMUSG00000032017 | -17.7      | Grik4    |
| ENSMUSG00000050092 | 10.8       | Sprr2b        | ENSMUSG00000026934 | -17.4      | Lhx3     |
| ENSMUSG00000044216 | 10.7       | Kcnj4         | ENSMUSG00000056427 | -17.1      | Slit3    |
| ENSMUSG00000032057 | 10.4       | 4833427G06Rik | ENSMUSG00000051504 | -16.6      | Siglech  |
| ENSMUSG00000044430 | 10.3       | Klk12         | ENSMUSG00000018907 | -16.4      | Alox12e  |
| ENSMUSG00000024379 | 10.3       | Tslp          | ENSMUSG00000017588 | -16.2      | Krt27    |
| ENSMUSG00000050635 | 10.3       | Sprr2f        | ENSMUSG00000000247 | -16.2      | Lhx2     |
| ENSMUSG00000110808 | 10.2       |               | ENSMUSG00000020102 | -16.1      | Slc16a7  |
| ENSMUSG00000062345 | 10.2       | Serpib2       | ENSMUSG00000058897 | -15.7      | Col25a1  |
| ENSMUSG00000045349 | 10.2       | Sh2d5         | ENSMUSG00000110417 | -15.6      |          |
| ENSMUSG00000026249 | 9.9        | Serpine2      | ENSMUSG00000047330 | -15.6      | Kcne4    |
| ENSMUSG00000099452 | 9.8        |               | ENSMUSG00000050505 | -15.6      | Pcdh20   |
| ENSMUSG00000020062 | 9.7        | Slc5a8        | ENSMUSG00000017897 | -15.5      | Eya2     |
| ENSMUSG00000064246 | 9.6        | Chil1         | ENSMUSG00000027570 | -15.5      | Col9a3   |
| ENSMUSG00000022483 | 9.5        | Col2a1        | ENSMUSG00000026888 | -15.3      | Grb14    |
| ENSMUSG00000097636 | 9.4        |               | ENSMUSG00000015787 | -15.2      | Abo      |
| ENSMUSG00000030155 | 9.4        | Clec2e        | ENSMUSG00000034353 | -15.2      | Ramp1    |
| ENSMUSG00000107350 | 9.1        |               | ENSMUSG00000074575 | -14.9      | Kcng1    |
| ENSMUSG00000029378 | 9.1        | Areg          | ENSMUSG00000078505 | -14.9      | Gm436    |
| ENSMUSG00000046159 | 9.0        | Chrm3         | ENSMUSG00000028782 | -14.8      | Adgrb2   |
| ENSMUSG00000049758 | 8.9        | Olfrl1318     | ENSMUSG00000075570 | -14.7      | Krt26    |
| ENSMUSG00000046694 | 8.9        | Fam46b        | ENSMUSG00000049556 | -14.6      | Lingo1   |
| ENSMUSG00000027420 | 8.8        | Bfsp1         | ENSMUSG00000006269 | -14.4      | Atp6v1b1 |
| ENSMUSG00000054215 | 8.8        | Sprr2k        | ENSMUSG00000028132 | -14.4      | Tmem56   |
| ENSMUSG00000061144 | 8.8        | Spink12       | ENSMUSG00000042258 | -14.4      | Isl1     |
| ENSMUSG00000037613 | 8.5        | Tnfrsf23      | ENSMUSG00000060560 | -14.3      | Ces4a    |
| ENSMUSG00000020839 | 8.5        | Tnfrsf1       | ENSMUSG00000047641 | -14.1      | Krt87    |
| ENSMUSG00000043472 | 8.5        | Lce3d         | ENSMUSG00000024366 | -14.1      | Gfra3    |
| ENSMUSG00000044748 | 8.5        | Defb1         | ENSMUSG00000030303 | -14.1      | Far2     |
| ENSMUSG00000042474 | 8.4        | Fcmr          | ENSMUSG00000043485 | -14.0      | Krt34    |
| ENSMUSG00000059230 | 8.4        | Defb4         | ENSMUSG00000022371 | -14.0      | Col14a1  |
| ENSMUSG00000068885 | 8.4        | Lce3f         | ENSMUSG00000024497 | -13.9      | Pou4f3   |
| ENSMUSG00000075602 | 8.3        | Ly6a          | ENSMUSG00000033595 | -13.8      | Lgj3     |
| ENSMUSG00000029161 | 8.3        | Cgref1        | ENSMUSG00000050377 | -13.7      | Il31ra   |
| ENSMUSG00000036814 | 8.0        | Slc6a20a      | ENSMUSG00000074971 | -13.4      | Fibin    |
| ENSMUSG00000050359 | 8.0        | Sprr1a        | ENSMUSG00000078507 | -13.3      | Aadacl3  |
| ENSMUSG00000074743 | 8.0        | Thbd          | ENSMUSG00000073902 | -13.3      |          |
| ENSMUSG00000035020 | 7.9        | Epgn          | ENSMUSG00000052821 | -13.2      | Cysl1r1  |
| ENSMUSG00000029019 | 7.9        | Nppb          | ENSMUSG00000021751 | -13.2      | Acox2    |
| ENSMUSG00000028610 | 7.8        | Dmrtb1        | ENSMUSG00000074736 | -13.2      | Syndig1  |
| ENSMUSG00000030790 | 7.6        | Adm           | ENSMUSG00000051251 | -13.0      | Nhlh1    |
| ENSMUSG00000068349 | 7.5        | Gml           | ENSMUSG0000005836  | -13.0      | Gata6    |

| EnsemblID          | FoldChange | Gene          | EnsemblID          | FoldChange | Gene          |
|--------------------|------------|---------------|--------------------|------------|---------------|
| ENSMUSG00000095385 | 7.5        | D630033O11Rik | ENSMUSG00000050315 | -13.0      | Synpo2        |
| ENSMUSG00000028970 | 7.3        | Abcb1b        | ENSMUSG00000007480 | -12.7      | Mc5r          |
| ENSMUSG00000046203 | 7.2        |               | ENSMUSG00000010505 | -12.7      | Myt1          |
| ENSMUSG00000034275 | 7.1        | Igsf9b        | ENSMUSG00000026875 | -12.6      | Traf1         |
| ENSMUSG00000032128 | 6.9        | Robo3         | ENSMUSG00000047992 | -12.6      | Fam69c        |
| ENSMUSG00000032131 | 6.9        | Abcg4         | ENSMUSG00000028492 | -12.5      | Saxo1         |
| ENSMUSG00000042425 | 6.9        | Frmpd3        | ENSMUSG00000047361 | -12.5      | Gm973         |
| ENSMUSG00000043518 | 6.8        | Rai2          | ENSMUSG00000067615 | -12.3      | Krt81         |
| ENSMUSG00000007783 | 6.8        | Cpt1c         | ENSMUSG00000070643 | -12.1      | Sox13         |
| ENSMUSG00000016346 | 6.8        | Kcnq2         | ENSMUSG00000087383 | -12.1      |               |
| ENSMUSG00000046449 | 6.7        | C77370        | ENSMUSG00000036242 | -12.0      | 3632451O06Rik |
| ENSMUSG00000004885 | 6.7        | Crabp2        | ENSMUSG00000020913 | -12.0      | Krt24         |
| ENSMUSG00000001986 | 6.7        | Gria3         | ENSMUSG00000044156 | -11.9      | Hepacam2      |

**Supplementary Table 2. Differentially expressed genes in the centrosome mutant**

**keratinocytes at P0.** List of Top 100 up- and down-regulated differentially expressed genes with  $\geq 2$ -fold changes and p-values  $< 0.05$  (two-tailed student's T-test) based on RNA-Seq analysis of Control and *K14-Cre+*; *Sas-4<sup>ff</sup>* epidermal keratinocytes at P0. The positive values are upregulated in the mutants.



**Supplementary Figure 3. The CRISPR/Cas9-generated hypomorphic alleles for *53bp1* and *Usp28* and their effect on p53 levels in centrosome mutants. (a,b)** Immunostaining of back-skin sections at P0 of Control and *K14-Cre+; Sas-4<sup>ff</sup>; 53bp1<sup>em/em</sup>* (a) or *K14-Cre+; Sas-4<sup>ff</sup>; Usp28<sup>em/em</sup>* (b) showing residual signal of 53BP1 (red) (a) or USP28 (red) (b) suggesting that they are hypomorphic alleles (scale bars: 50  $\mu$ m). (a,b,c) TUBG (green) marks the centrosomes. Dashed line represents the epidermal-dermal interface in all panels (c,d) Immunostaining (c) and quantification (d) of p53 (red) in back-skin sections at P0 of Control (n=5), *K14-Cre+; Sas-4<sup>ff</sup>* (n=5), *K14-Cre+; Sas-4<sup>ff</sup>; 53bp1<sup>em/em</sup>* (n=4) and *K14-Cre+; Sas-4<sup>ff</sup>; Usp28<sup>em/em</sup>* (n=4) (scale bar: 50  $\mu$ m). The Control and *K14-Cre+; Sas-4<sup>ff</sup>* are part of the same experiment in Figure 2b. \* p < 0.05, \*\*\*\* p < 0.0001 (two-tailed student's T-test). Bars represent mean  $\pm$  SD.

# Supplementary Figure 4

**a**  
E16.5  
*K14-Cre<sup>+</sup>; Sas-4<sup>fl/w</sup>; p53<sup>fl/fl</sup>*

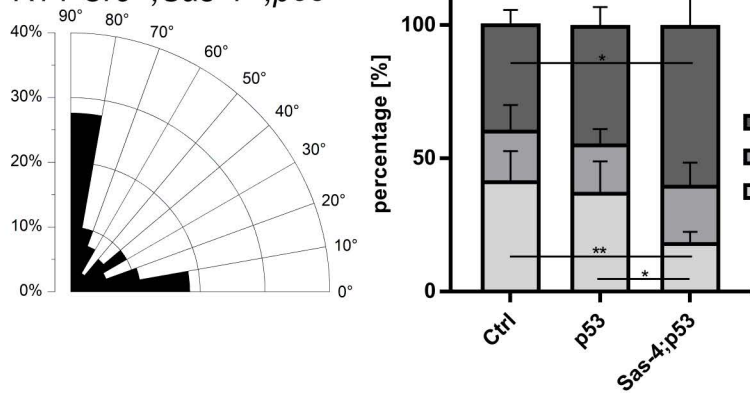

**b**  
E16.5  
*K14-Cre<sup>+</sup>; Sas-4<sup>fl/fl</sup>*

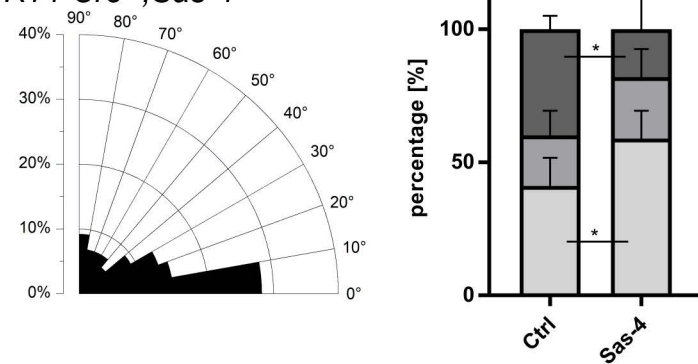

**c**

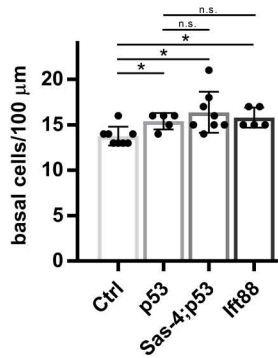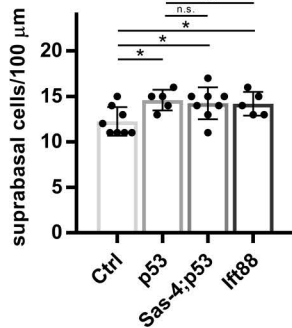

**d**

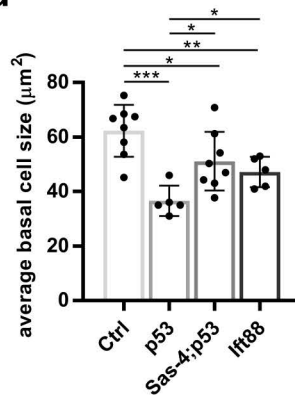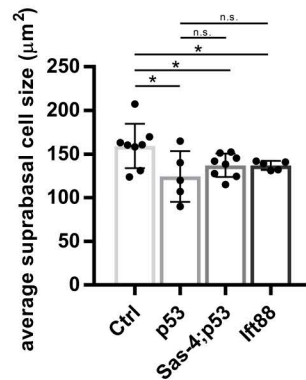

**e**

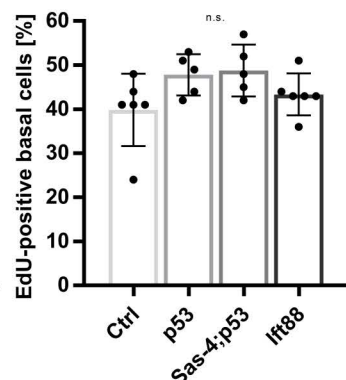

**Supplementary Figure 4. Cell division orientation measurements, cell density and cell size in the epidermis of the different mutants and controls. (a,b)** Radial histogram distribution of the angles of cell division in late anaphase to telophase of basal epidermal cells at E16.5 of *K14-Cre+; Sas-4<sup>fl/w</sup>; p53<sup>fl/fl</sup>* (a) and *K14-Cre+; Sas-4<sup>fl/fl</sup>* (b) animals. Percentages of parallel (0 - 29°), oblique (30 - 59°) and perpendicular (60 - 90°) divisions (right) of Controls (n=5), *K14-Cre+; Sas-4<sup>fl/w</sup>; p53<sup>fl/fl</sup>* (n=3), *K14-Cre+; Sas-4<sup>fl/fl</sup>; p53<sup>fl/fl</sup>* (n=5) (a), or Control (n=3) and *K14-Cre+; Sas-4<sup>fl/fl</sup>* (n=3) (b) animals. Control and *K14-Cre+; Sas-4<sup>fl/fl</sup>; p53<sup>fl/fl</sup>* are parts of the same experiment shown in Fig. 4c. (c) Quantification of the density (cells per 100 μm) of basal and suprabasal layer cells of back-skin sections of the epidermis of Control (n=8), *K14-Cre+; Sas-4<sup>fl/w</sup>; p53<sup>fl/fl</sup>* (n=5), *K14-Cre+; Sas-4<sup>fl/fl</sup>; p53<sup>fl/fl</sup>* (n=8) and *K14-Cre+; Ift88<sup>fl/fl</sup>* (n=5) mice at E16.5. Control and *K14-Cre+; Sas-4<sup>fl/fl</sup>; p53<sup>fl/fl</sup>* are parts of the same experiment shown in Fig. 4g,h. (d) Quantification of the average cell size of basal and suprabasal layer cells in (c). Control and *K14-Cre+; Sas-4<sup>fl/fl</sup>; p53<sup>fl/fl</sup>* are part of the same experiment shown in Fig. 4i,j. (e) Quantification of the percentage of the EdU-positive cells in the basal layer of back-skin epidermal sections of Control (n=6), *K14-Cre+; Sas-4<sup>fl/w</sup>; p53<sup>fl/fl</sup>* (n=5), *K14-Cre+; Sas-4<sup>fl/fl</sup>; p53<sup>fl/fl</sup>* (n=5) and *K14-Cre+; Ift88<sup>fl/fl</sup>* (n=6) mice at E16.5. n. s. = not significant, \* p < 0.05, \*\* p < 0.01, \*\*\* p < 0.001 (two-tailed student's T-test). Bars represent mean ± SD.



# Supplementary Figure 5

**a**

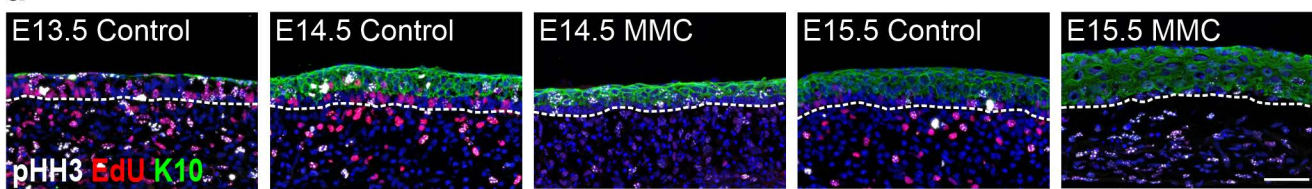

**b**

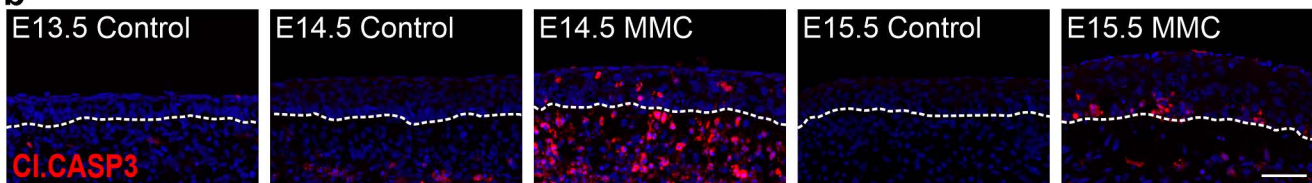

**c**

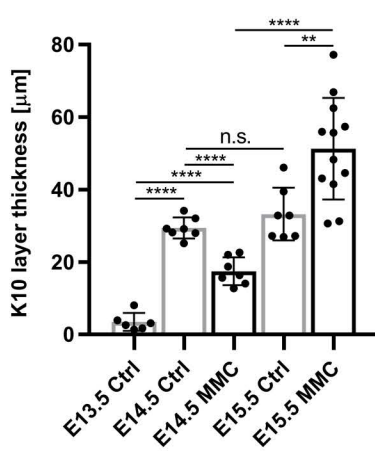

**d**

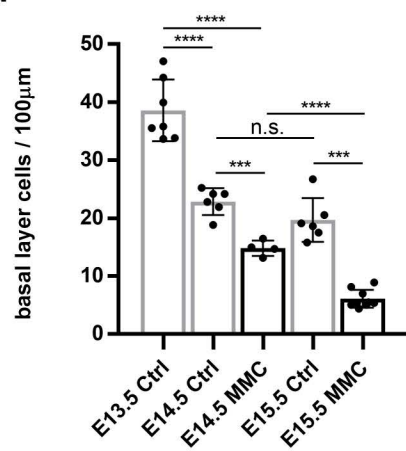

**e**

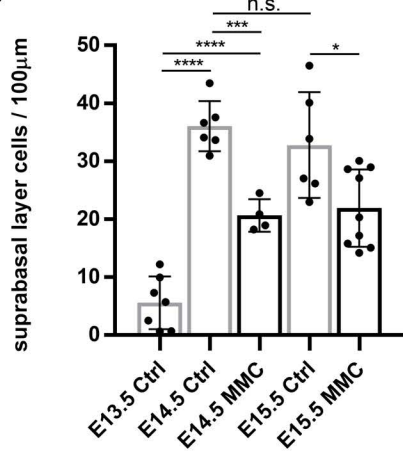

**f**

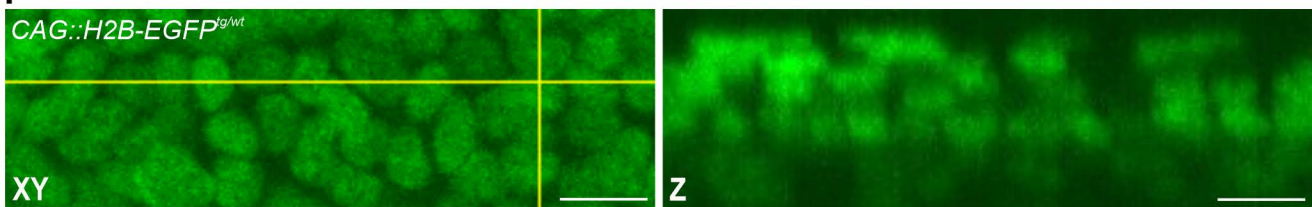

**g**

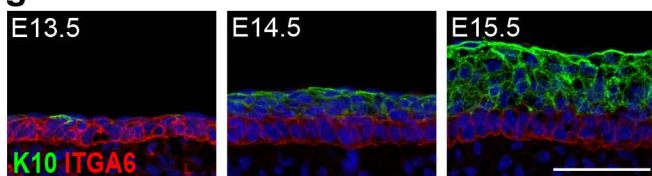

**h**

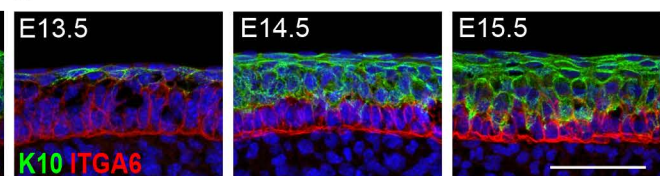

**i**

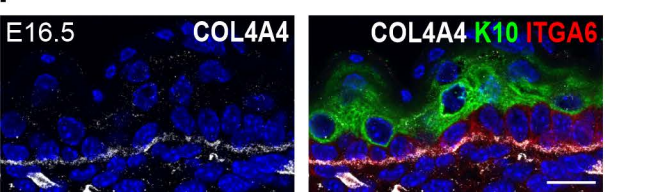

**j**

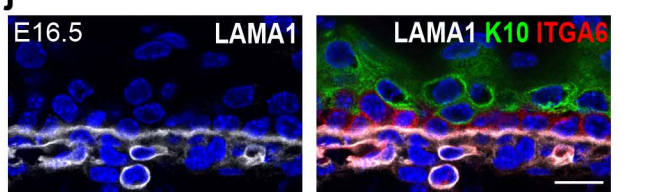



**Supplementary Figure 5. Methods to culture, study and image skin explants. (a,b)**

Immunostaining for pHH3 (white), EdU (red), and K10 (green) (**a**) or Cl.CASP3 (red) (**b**) of Control and MMC-treated flat skin explants on filters at the indicated stages (scale bars: 50  $\mu$ m). Dashed line represents the epidermal-dermal interface in all panels. (**c**) Quantification of the K10-positive layer thickness in the Control and MMC-treated skin explants. E13.5: Control n=6, E14.5: Control: n=7, MMC-treated: n=7, E15.5: Control: n=7, MMC-treated n=12 (**d,e**) Quantification of the density (cells per 100  $\mu$ m) of basal (**d**) and suprabasal (**e**) layer cells of Control and MMC-treated skin explants. E13.5 Control: n=7, E14.5: Control: n=6, MMC-treated: n=4, E15.5: Control n=6, MMC-treated n=9) (**c,d,e**) n.s. = not significant, \*  $p < 0.05$ , \*\*  $p < 0.01$ , \*\*\*  $p < 0.001$ , \*\*\*\*  $p < 0.0001$  (two-tailed student's T-test or one-way ANOVA and Tukey's multiple comparisons test without adjustments). Bars represent mean  $\pm$  SD. (**f**) Representative image of the CAG::H2B-EGFP (green) reporter taken from the time-lapses of flat skin explants at E14.5 shown in the XY (yellow lines) and Z dimensions (scale bars: 10  $\mu$ m). (**g,h**) Immunostaining of the skin explant rolls (**g**), used for time-lapse imaging, and the flat skin explants (**h**) at E13.5-E15.5, for ITGA6 (red) and K10 (green) (scale bars: 50  $\mu$ m). (**i,j**) Immunostaining of back-skin sections at E16.5 for the basement membrane marker COL4A4 (white) (**i**) or LAMA1 (white) (**j**) with ITGA6 (red) and K10 (green) (scale bars: 15  $\mu$ m).

# Supplemental Figure 6

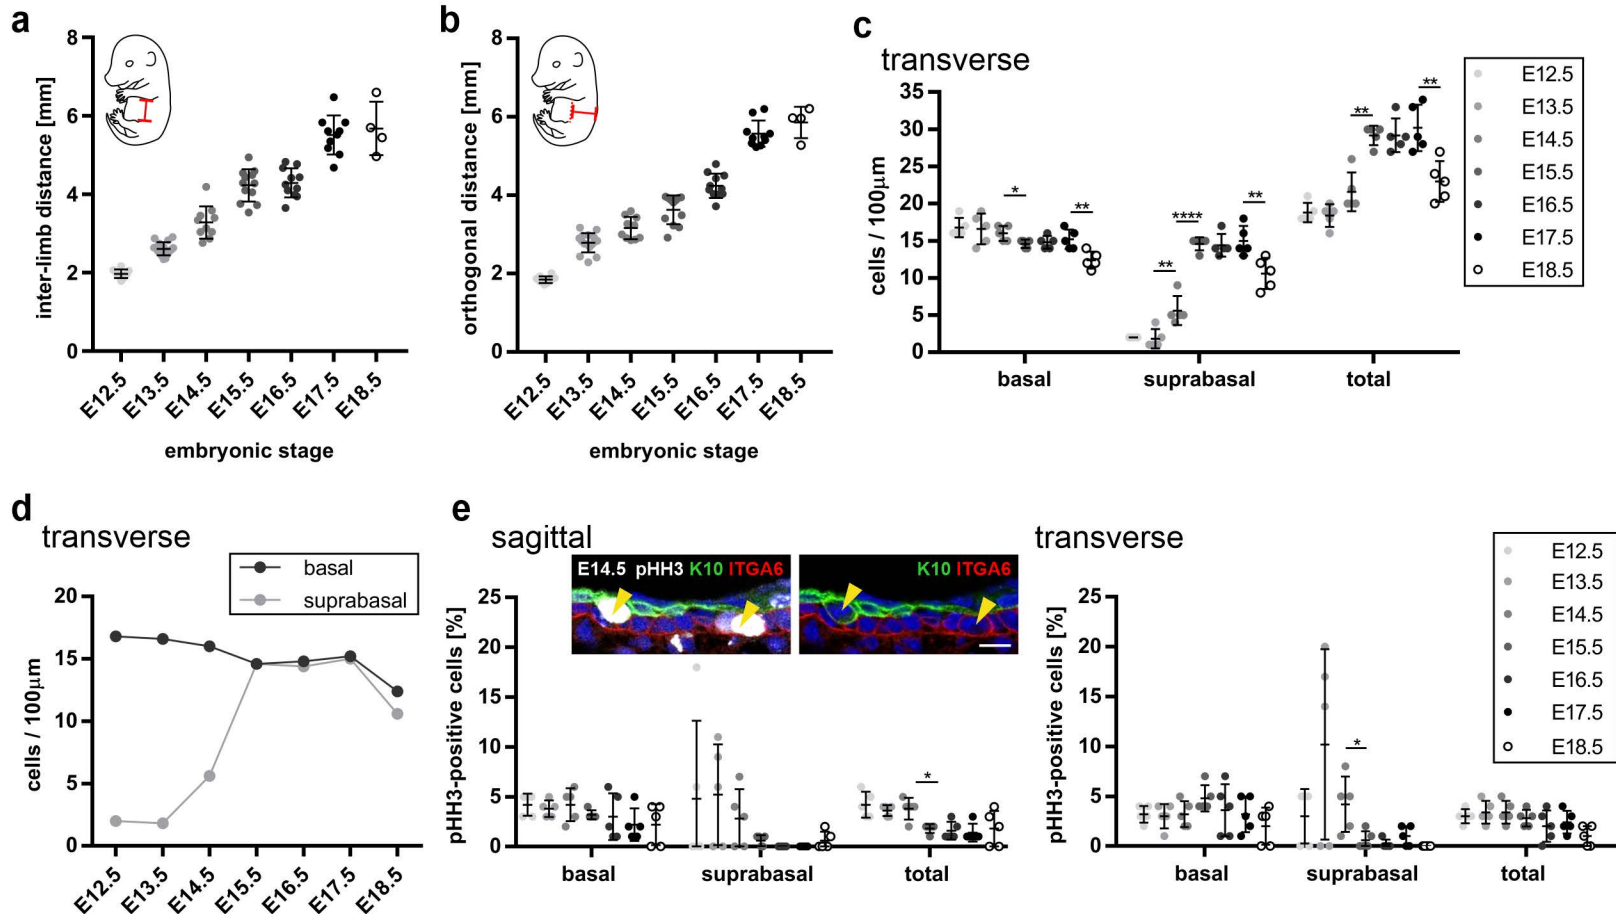

**Supplementary Figure 6. Measurements of tissue growth, cell densities and mitotic indices in the different axes.** (a,b) Quantification of the inter-limb distance (a) and orthogonal distance (b) as depicted in the embryo schematics (red lines) of wild-type embryos from E12.5-E18.5. E12.5: n=10, E13.5: n=16, E14.5: n=10, E15.5: n=12, E16.5: n=11, E17.5: n=10 and E18.5: n=4 (c,d) Cell densities (cells per 100  $\mu$ m) of basal and suprabasal layer cells from transverse back-skin sections of the epidermis between E12.5-E18.5 (n = 5 independent animals). (e) Quantification of pHH3-positive (white) basal (ITGA6, red) and suprabasal (K10, green) cells of sagittal and transverse back-skin sections of the epidermis between E12.5-E18.5 (n = 5 independent animals), with examples of the immunostaining shown at E14.5 (arrowheads, scale bar: 10  $\mu$ m). \* p < 0.05, \*\* p < 0.01, \*\*\*\* p < 0.0001 (two-tailed student's T-test). Bars represent mean  $\pm$  SD.

### Supplementary Table 3

|          | <i>53bp1</i>                    | <i>Usp28</i>         |
|----------|---------------------------------|----------------------|
| Exon     | Exon 2                          | Exon 2               |
| gRNA     | TACTGGAAGTCAATTGGATT            | AATCAGCTGCGAGAAATCAC |
| Mutation | 31 bp deletion                  | 16 bp deletion       |
| Deleted  | GGACCCTACTGGAAGTCAATTGGATTCAGAT | CTGCGAGAAATCACAG     |
| Primer 1 | TCGAACTGATCTTTTGTATTCCA         | TCAAAAACAGAGCTGCCAGA |
| Primer 2 | GAACAGGGCATCATCACTCA            | CACACCTGACATGTGGGAAA |

**Supplementary Table 3. Endonuclease-mediated knockouts of *53bp1* and *Usp28*.** List of used gRNAs and resulting mutation including used primer sequences.

**Supplementary Table 4**

| Gene            | Primer               | Sequence                      |
|-----------------|----------------------|-------------------------------|
| <i>GFP</i>      | IMR 872 H2B GFP F    | AAGTTCATCTGCACCACCG           |
| <i>GFP</i>      | IMR 873 H2B GFP R    | TGCTCAGGTAGTGGTTGTCCG         |
| <i>Cre</i>      | Cre_F                | TGATGGACATGTTTCAGGGATC        |
| <i>Cre</i>      | Cre_R                | CAGCCACCAGCTTGCATGA           |
| <i>Trp53</i>    | Int10F               | CACAAAAACAGGTAAACCCA          |
| <i>Trp53</i>    | Int10R               | GAAGACAGAAAAGGGGAGGG          |
| <i>Trp53</i>    | Rec1F                | AAGGGGTATGAGGGACAAGG          |
| <i>lft88</i>    | lft88_wt             | GCCTCCTGTTTCTTGACAACAGTG      |
| <i>lft88</i>    | lft88_fl             | GGTCCTAACAAGTAAGCCCAGTGTT     |
| <i>lft88</i>    | lft88_delta          | CTGCACCAGCCATTTCTCTAAGTCATGTA |
| <i>Sas-4</i>    | Cenpj LoxP2F:        | TGCTTGCTTGTCTCTCTCTGA         |
| <i>Sas-4</i>    | Cenpj LoxP2R:        | GCTGACACCAAGTGGGAAAT          |
| <i>Sas-4</i>    | (delta) Cenpj FRT1F: | GGGGAGCAGACTTCAACACT          |
| <i>Usp28</i>    | Usp28Ex2short F2     | TCAAAAACAGAGCTGCCAGA          |
| <i>Usp28</i>    | Usp28Ex2short R      | CACACCTGACATGTGGGAAA          |
| <i>Trp53bp1</i> | 53bp1_Ex2 Fshort     | TCGAACTGATCTTTTGTATTCCA       |
| <i>Trp53bp1</i> | 53bp1_Ex2 Rshort     | GAACAGGGCATCATCACTCA          |

**Supplementary Table 4. Genotyping primers.** List of used primers for genotyping.

**Supplementary Table 5**

| Primary Antibodies     |                     |                      |                   |                 |                          |
|------------------------|---------------------|----------------------|-------------------|-----------------|--------------------------|
| Antigen                | Species/<br>Isotype | Company              | Catalog<br>number | LOT number      | Working<br>dilution (IF) |
| 53BP1                  | rabbit              | Novus<br>Biologicals | NB100-<br>305SS   | F-4             | 1:1000                   |
| ARL13B                 | rabbit              | Proteintech          | 17711-1-AP        | 00023380        | 1:1000                   |
| CEP164                 | rabbit              | Proteintech          | 22227-1-AP        | 00045133        | 1:2000                   |
| Cleaved-<br>Caspase3   | rabbit              | Cell Signaling       | 9661              | 43              | 1:400                    |
| Collagen type<br>IV    | rabbit              | Merck                | AB756P            | 2909683         | 1:400                    |
| Integrin- $\alpha$ 6   | rat IgG2a           | R&D Systems          | MAB13501          | INVV0117051     | 1:1000                   |
| Keratin1               | rabbit              | BioLegend            | 905601            | D14BF00320      | 1:4000                   |
| Keratin10              | guinea pig          | Progen               | GP-K10            | 911191          | 1:400                    |
| Keratin14              | guinea pig          | Progen               | GP-CK14           | 603171          | 1:400                    |
| Keratin6A              | rabbit              | BioLegend            | 905701            | B203935         | 1:4000                   |
| Ki67                   | rabbit              | ThermoFisher         | PA5-19462         | GR3293888-<br>1 | 1:400                    |
| Laminin                | rabbit              | Sigma Aldrich        | L9393             | 125M4801V       | 1:1000                   |
| Loricrin               | rabbit              | BioLegend            | 905101            | D15IF01641      | 1:2000                   |
| p21                    | mouse               | Santa Cruz           | sc-6246           | B2715           | 1:50                     |
| p53 (CM5)              | rabbit              | Linaris              | LIN-P956          | 6044554         | 1:1000                   |
| p63                    | mouse               | Abcam                | ab735             | GR286167-1      | 1:25                     |
| p73                    | rabbit              | Abcam                | ab40658           | EP436Y          | 1:1000                   |
| Phospho-<br>Histone H3 | rabbit              | Merck                | 06-570            | 2724351         | 1:400                    |
| Survivin               | rabbit              | Cell Signaling       | 2808              | 15              | 1:400                    |
| USP28                  | rabbit              | Sigma Aldrich        | HPA006778         | A105224         | 1:500                    |
| $\gamma$ -Tubulin      | mouse<br>IgG1       | Sigma Aldrich        | T6557             | 049M4786V       | 1:2000                   |

| Secondary Antibodies                    |                     |            |                   |               |                          |
|-----------------------------------------|---------------------|------------|-------------------|---------------|--------------------------|
| Antigen                                 | Species/<br>Isotype | Company    | Catalog<br>number | LOT<br>number | Working<br>dilution (IF) |
| AlexaFluor 488 $\alpha$ -<br>mouse      | goat                | Invitrogen | A11029            | 1704587       | 1:1000                   |
| AlexaFluor 488 $\alpha$ -<br>rabbit     | goat                | Invitrogen | A11034            | 2069632       | 1:1000                   |
| AlexaFluor 488 $\alpha$ -<br>guinea pig | goat                | Invitrogen | A11073            | 1737010       | 1:1000                   |
| AlexaFluor 568 $\alpha$ -<br>mouse      | goat                | Invitrogen | A11031            | 1602786       | 1:1000                   |
| AlexaFluor 568 $\alpha$ -<br>rabbit     | goat                | Invitrogen | A11036            | 2155282       | 1:1000                   |
| AlexaFluor 568 $\alpha$ -rat            | goat                | Invitrogen | A11077            | 1692966       | 1:1000                   |
| AlexaFluor 647 $\alpha$ -<br>rabbit     | goat                | Invitrogen | A21245            | 1700082       | 1:1000                   |
| AlexaFluor 647 $\alpha$ -rat            | goat                | Invitrogen | A21247            | 1719171       | 1:1000                   |
| AlexaFluor 647 $\alpha$ -<br>guinea pig | goat                | Invitrogen | A21450            | 2026140       | 1:1000                   |
| Dyes                                    |                     |            |                   |               |                          |
| DAPI                                    | n.a.                | AppliChem  | A4099             | n.a.          | 1:1000                   |

**Supplementary Table 5. Antibodies and dyes used for immunofluorescence stainings.** List of primary antibodies, secondary antibodies, dyes, catalog numbers, LOT numbers and dilutions used for immunofluorescence stainings.
