# Supplementary material for: High proliferation and delamination during skin epidermal stratification
Source: PubMed Central journal article supplement (PMC8163813; doi:10.1038/s41467-021-23386-4), 2021-05-28
Supplement: 41467_2021_23386_MOESM7_ESM.pdf [file 41467_2021_23386_MOESM7_ESM.pdf]

## Reporting Summary

Nature Research wishes to improve the reproducibility of the work that we publish. This form provides structure for consistency and transparency in reporting. For further information on Nature Research policies, see our [Editorial Policies](#) and the [Editorial Policy Checklist](#).

### Statistics

For all statistical analyses, confirm that the following items are present in the figure legend, table legend, main text, or Methods section.

n/a Confirmed

- |                                     |                                     |                                                                                                                                                                                                                                                            |
|-------------------------------------|-------------------------------------|------------------------------------------------------------------------------------------------------------------------------------------------------------------------------------------------------------------------------------------------------------|
| <input type="checkbox"/>            | <input checked="" type="checkbox"/> | The exact sample size ( $n$ ) for each experimental group/condition, given as a discrete number and unit of measurement                                                                                                                                    |
| <input type="checkbox"/>            | <input checked="" type="checkbox"/> | A statement on whether measurements were taken from distinct samples or whether the same sample was measured repeatedly                                                                                                                                    |
| <input type="checkbox"/>            | <input checked="" type="checkbox"/> | The statistical test(s) used AND whether they are one- or two-sided<br><i>Only common tests should be described solely by name; describe more complex techniques in the Methods section.</i>                                                               |
| <input checked="" type="checkbox"/> | <input type="checkbox"/>            | A description of all covariates tested                                                                                                                                                                                                                     |
| <input checked="" type="checkbox"/> | <input type="checkbox"/>            | A description of any assumptions or corrections, such as tests of normality and adjustment for multiple comparisons                                                                                                                                        |
| <input type="checkbox"/>            | <input checked="" type="checkbox"/> | A full description of the statistical parameters including central tendency (e.g. means) or other basic estimates (e.g. regression coefficient) AND variation (e.g. standard deviation) or associated estimates of uncertainty (e.g. confidence intervals) |
| <input type="checkbox"/>            | <input checked="" type="checkbox"/> | For null hypothesis testing, the test statistic (e.g. $F$ , $t$ , $r$ ) with confidence intervals, effect sizes, degrees of freedom and $P$ value noted<br><i>Give <math>P</math> values as exact values whenever suitable.</i>                            |
| <input checked="" type="checkbox"/> | <input type="checkbox"/>            | For Bayesian analysis, information on the choice of priors and Markov chain Monte Carlo settings                                                                                                                                                           |
| <input checked="" type="checkbox"/> | <input type="checkbox"/>            | For hierarchical and complex designs, identification of the appropriate level for tests and full reporting of outcomes                                                                                                                                     |
| <input checked="" type="checkbox"/> | <input type="checkbox"/>            | Estimates of effect sizes (e.g. Cohen's $d$ , Pearson's $r$ ), indicating how they were calculated                                                                                                                                                         |

*Our web collection on [statistics for biologists](#) contains articles on many of the points above.*

### Software and code

Policy information about [availability of computer code](#)

Data collection

Data analysis

For manuscripts utilizing custom algorithms or software that are central to the research but not yet described in published literature, software must be made available to editors and reviewers. We strongly encourage code deposition in a community repository (e.g. GitHub). See the Nature Research [guidelines for submitting code & software](#) for further information.

### Data

Policy information about [availability of data](#)

All manuscripts must include a [data availability statement](#). This statement should provide the following information, where applicable:

- Accession codes, unique identifiers, or web links for publicly available datasets
- A list of figures that have associated raw data
- A description of any restrictions on data availability

All the data that support the findings in this study are included within the paper and its supporting information. The RNAseq data has been deposited in the GEO repository under GSE161387 (<https://www.ncbi.nlm.nih.gov/geo/query/acc.cgi?acc=GSE161387>). Source data are provided with this paper.

The PID pathway database is accessible via the Molecular Signatures Database v7.2 of GSEA under <http://www.gsea-msigdb.org/gsea/msigdb/genesets.jsp?collection=CP:PID>.

The data that supports the findings of this study are provided in the main figures and supplementary figures, the published Source data file, or is available from the corresponding author upon reasonable request. The following figures have associated raw data:

Figure 1a,b,d-h, Figure 2a-j, Figure 3b-e, Figure 4a-j, Figure 5a-d, Figure 6a-e, Figure 7a, Suppl. Figure 1a-e, Suppl. Figure 1a-c; Suppl. Figure 2a-d; Suppl. Figure 3a-d; Suppl. Figure 4a-e; Suppl. Figure 5a-j; Suppl. Figure 6a-e.

## Field-specific reporting

Please select the one below that is the best fit for your research. If you are not sure, read the appropriate sections before making your selection.

Life sciences  Behavioural & social sciences  Ecological, evolutionary & environmental sciences

For a reference copy of the document with all sections, see [nature.com/documents/nr-reporting-summary-flat.pdf](https://www.nature.com/documents/nr-reporting-summary-flat.pdf)

## Life sciences study design

All studies must disclose on these points even when the disclosure is negative.

|                 |                                                                                                                                                                                                                                                                                                                                                                                                                            |
|-----------------|----------------------------------------------------------------------------------------------------------------------------------------------------------------------------------------------------------------------------------------------------------------------------------------------------------------------------------------------------------------------------------------------------------------------------|
| Sample size     | No statistical method was used to predetermine sample size. The samples were independent biological replicates (animals) of n=3 or more and their number conformed to acceptable standards in the field and minimal statistical analyses requirements. Because our work involved animals, we employed the 3Rs to reduce the number of animals used in our experiments to the minimum requirements for statistical testing. |
| Data exclusions | No data obtained from technically successful experiments were excluded from the analyses.                                                                                                                                                                                                                                                                                                                                  |
| Replication     | The data were obtained from at least three independent experiments ensuring reproducibility.                                                                                                                                                                                                                                                                                                                               |
| Randomization   | The samples were grouped by genotype or treatment and randomization was not applicable.                                                                                                                                                                                                                                                                                                                                    |
| Blinding        | The phenotype always correlated with the genotype and therefore blinding was not possible.                                                                                                                                                                                                                                                                                                                                 |

## Reporting for specific materials, systems and methods

We require information from authors about some types of materials, experimental systems and methods used in many studies. Here, indicate whether each material, system or method listed is relevant to your study. If you are not sure if a list item applies to your research, read the appropriate section before selecting a response.

### Materials & experimental systems

| n/a                                 | Involvement in the study                                        |
|-------------------------------------|-----------------------------------------------------------------|
| <input type="checkbox"/>            | <input checked="" type="checkbox"/> Antibodies                  |
| <input checked="" type="checkbox"/> | <input type="checkbox"/> Eukaryotic cell lines                  |
| <input checked="" type="checkbox"/> | <input type="checkbox"/> Palaeontology and archaeology          |
| <input type="checkbox"/>            | <input checked="" type="checkbox"/> Animals and other organisms |
| <input type="checkbox"/>            | <input checked="" type="checkbox"/> Human research participants |
| <input checked="" type="checkbox"/> | <input type="checkbox"/> Clinical data                          |
| <input checked="" type="checkbox"/> | <input type="checkbox"/> Dual use research of concern           |

### Methods

| n/a                                 | Involvement in the study                           |
|-------------------------------------|----------------------------------------------------|
| <input checked="" type="checkbox"/> | <input type="checkbox"/> ChIP-seq                  |
| <input type="checkbox"/>            | <input checked="" type="checkbox"/> Flow cytometry |
| <input checked="" type="checkbox"/> | <input type="checkbox"/> MRI-based neuroimaging    |

## Antibodies

|                 |                                                                                                                                                                                         |
|-----------------|-----------------------------------------------------------------------------------------------------------------------------------------------------------------------------------------|
| Antibodies used | The relevant information about antibodies is supplied in Supplementary Tables.                                                                                                          |
| Validation      | The antibodies used in this study were all commercial and validation information for application and antigen specificity is provided in the respective data sheets of the manufacturer. |

## Animals and other organisms

Policy information about [studies involving animals](#); [ARRIVE guidelines](#) recommended for reporting animal research

|                         |                                                                                                                                                                                                                                                                                                                                                         |
|-------------------------|---------------------------------------------------------------------------------------------------------------------------------------------------------------------------------------------------------------------------------------------------------------------------------------------------------------------------------------------------------|
| Laboratory animals      | Both male and female mice of C57Bl6/N and FVB/Nrj background were used in this study. Ages of the animals are indicated in the Figure legends. The animals were generated, housed and bred under standard conditions in the CECAD ivRF under a 12h light cycle, at a temperature of 22±2°C, 55±5% relative humidity and with food and water ad libitum. |
| Wild animals            | No wild animals were used in this study.                                                                                                                                                                                                                                                                                                                |
| Field-collected samples | No field-collected samples were used in this study.                                                                                                                                                                                                                                                                                                     |

Ethics oversight

The experiments involving animals were approved by the Landesamt für Natur, Umwelt, und Verbraucherschutz Nordrhein-Westfalen (LANUV), Germany (animal applications: 84-02.04.2014.A372, 84-02.04.2015.A405 and 81-02.04.2019.A476).

Note that full information on the approval of the study protocol must also be provided in the manuscript.

## Human research participants

Policy information about [studies involving human research participants](#)

Population characteristics

Samples from both male and female individuals (controls and diagnosed with psoriasis or atopic dermatitis) within an age range between 5 and 79 years and of different body regions were provided by the Biobank of SFB829 Z4 platform.

Recruitment

Samples were obtained from the skin sample collection of the SFB829 Z4 Biobank.

Ethics oversight

The study protocol conformed to the ethical guidelines of the 1975 Declaration of Helsinki and was approved by the Ethics Committee of the Medical Faculty of University of Cologne (Registration No. 12-163). Informed consent has been obtained.

Note that full information on the approval of the study protocol must also be provided in the manuscript.

## Flow Cytometry

### Plots

Confirm that:

- The axis labels state the marker and fluorochrome used (e.g. CD4-FITC).
- The axis scales are clearly visible. Include numbers along axes only for bottom left plot of group (a 'group' is an analysis of identical markers).
- All plots are contour plots with outliers or pseudocolor plots.
- A numerical value for number of cells or percentage (with statistics) is provided.

### Methodology

Sample preparation

Freshly isolated epidermal keratinocytes were fixed in 70% ethanol and stored at -20 °C for several weeks. Then they were centrifuged at 77 xg, washed in 1x PBS and resuspended in Propidium Iodide staining solution (10 µg/ml PI, 200 µg/ml RNase A, 0.1 % TritonTM X-100 in 1x PBS). After incubating at RT for 30 mins, cell cycle analysis was performed using a LSRFortessa (BD) FACS machine. Data were analyzed using the FlowJo software.

Instrument

LSRFortessa (BD)

Software

FlowJo software

Cell population abundance

All cells stained with PI were analyzed excluding cell debris.

Gating strategy

FSC/SSC gating was used to exclude cell debris. PI-stained cells were detected in PE channel and Watson pragmatic model implemented in FlowJo software was used to analyze the cell cycle proportions.

- Tick this box to confirm that a figure exemplifying the gating strategy is provided in the Supplementary Information.
